# Supplementary material
Source: publisher figshare collection journal article supplement (https://acs.figshare.com/ndownloader/files/4266568)
Supplement: Supplementary file 1 [file 4266568]

 
data_datam
 
_audit_creation_method            SHELXL-97
_chemical_name_systematic
;
 ?
;
_chemical_name_common             '2,3,4-Trichlorophenol'
_chemical_melting_point           ?
_chemical_formula_moiety          ?
_chemical_formula_sum
 'C6 H3 Cl3 O'
_chemical_formula_weight          197.43
 
loop_
 _atom_type_symbol
 _atom_type_description
 _atom_type_scat_dispersion_real
 _atom_type_scat_dispersion_imag
 _atom_type_scat_source
 'C'  'C'   0.0033   0.0016
 'International Tables Vol C Tables 4.2.6.8 and 6.1.1.4'
 'H'  'H'   0.0000   0.0000
 'International Tables Vol C Tables 4.2.6.8 and 6.1.1.4'
 'O'  'O'   0.0106   0.0060
 'International Tables Vol C Tables 4.2.6.8 and 6.1.1.4'
 'Cl'  'Cl'   0.1484   0.1585
 'International Tables Vol C Tables 4.2.6.8 and 6.1.1.4'
 
_symmetry_cell_setting            ?
_symmetry_space_group_name_H-M    'P 21/n'
 
loop_
 _symmetry_equiv_pos_as_xyz
 'x, y, z'
 '-x+1/2, y+1/2, -z+1/2'
 '-x, -y, -z'
 'x-1/2, -y-1/2, z-1/2'
 
_cell_length_a                    3.8010(6)
_cell_length_b                    12.7973(17)
_cell_length_c                    14.816(3)
_cell_angle_alpha                 90.00
_cell_angle_beta                  96.902(7)
_cell_angle_gamma                 90.00
_cell_volume                      715.5(2)
_cell_formula_units_Z             4
_cell_measurement_temperature     150(2)
_cell_measurement_reflns_used     1914
_cell_measurement_theta_min       1.6
_cell_measurement_theta_max       27.5
 
_exptl_crystal_description        plate
_exptl_crystal_colour             colourless
_exptl_crystal_size_max           0.50
_exptl_crystal_size_mid           0.10
_exptl_crystal_size_min           0.05
_exptl_crystal_density_meas       ?
_exptl_crystal_density_diffrn     1.833
_exptl_crystal_density_method     'not measured'
_exptl_crystal_F_000              392
_exptl_absorpt_coefficient_mu     1.195
_exptl_absorpt_correction_type    'Multi-scan'
_exptl_absorpt_correction_T_min   0.5864
_exptl_absorpt_correction_T_max   0.9427
_exptl_absorpt_process_details    'Jacobson, R. (1998) Private communication'
 
_exptl_special_details
;
 ?
;
 
_diffrn_ambient_temperature       150(2)
_diffrn_radiation_wavelength      0.71073
_diffrn_radiation_type            MoK\a
_diffrn_radiation_source          'fine-focus sealed tube'
_diffrn_radiation_monochromator   graphite
_diffrn_measurement_device
;
XtaLABmini: Fixed Chi 2 circle
;
_diffrn_measurement_device_type
;
Rigaku Mercury375R (2x2 bin mode)
;
_diffrn_detector_area_resol_mean        13.6612
_diffrn_standards_number          ?
_diffrn_standards_interval_count  ?
_diffrn_standards_interval_time   ?
_diffrn_standards_decay_%         ?
_diffrn_reflns_number             7381
_diffrn_reflns_av_R_equivalents   0.0812
_diffrn_reflns_av_sigmaI/netI     0.0505
_diffrn_reflns_limit_h_min        -4
_diffrn_reflns_limit_h_max        4
_diffrn_reflns_limit_k_min        -16
_diffrn_reflns_limit_k_max        16
_diffrn_reflns_limit_l_min        -19
_diffrn_reflns_limit_l_max        19
_diffrn_reflns_theta_min          2.11
_diffrn_reflns_theta_max          27.50
_diffrn_measured_fraction_theta_max    0.999
_diffrn_reflns_theta_full              27.50
_diffrn_measured_fraction_theta_full   0.999
_reflns_number_total              1636
_reflns_number_gt                 1517
_reflns_threshold_expression      >2\s(I)
 
_computing_data_collection
;
CrystalClear-SM Expert 2.0 rc14 (Rigaku, 2009)
;
_computing_cell_refinement
;
CrystalClear-SM Expert 2.0 rc14 (Rigaku, 2009)
;
_computing_data_reduction
;
CrystalClear-SM Expert 2.0 rc14 (Rigaku, 2009)
;
_computing_structure_solution     'SHELXL-97 (Sheldrick, 2008)'
_computing_structure_refinement   'SHELXL-97 (Sheldrick, 2008)'
_computing_molecular_graphics     ?
_computing_publication_material   ?
 
_refine_special_details
;
 Refinement of F^2^ against ALL reflections.  The weighted R-factor wR and
 goodness of fit S are based on F^2^, conventional R-factors R are based
 on F, with F set to zero for negative F^2^. The threshold expression of
 F^2^ > 2\s(F^2^) is used only for calculating R-factors(gt) etc. and is
 not relevant to the choice of reflections for refinement.  R-factors based
 on F^2^ are statistically about twice as large as those based on F, and R-
 factors based on ALL data will be even larger.
;
 
_refine_ls_structure_factor_coef  Fsqd
_refine_ls_matrix_type            full
_refine_ls_weighting_scheme       calc
_refine_ls_weighting_details
 'calc w=1/[\s^2^(Fo^2^)+(0.0458P)^2^+0.3327P] where P=(Fo^2^+2Fc^2^)/3'
_atom_sites_solution_primary      direct
_atom_sites_solution_secondary    difmap
_atom_sites_solution_hydrogens    geom
_refine_ls_hydrogen_treatment     constr
_refine_ls_extinction_method      none
_refine_ls_extinction_coef        ?
_refine_ls_number_reflns          1636
_refine_ls_number_parameters      92
_refine_ls_number_restraints      0
_refine_ls_R_factor_all           0.0363
_refine_ls_R_factor_gt            0.0326
_refine_ls_wR_factor_ref          0.1027
_refine_ls_wR_factor_gt           0.0842
_refine_ls_goodness_of_fit_ref    1.159
_refine_ls_restrained_S_all       1.159
_refine_ls_shift/su_max           0.006
_refine_ls_shift/su_mean          0.000
_refine_diff_density_max    0.383
_refine_diff_density_min   -0.365
_refine_diff_density_rms    0.094
 
loop_
 _atom_site_label
 _atom_site_type_symbol
 _atom_site_fract_x
 _atom_site_fract_y
 _atom_site_fract_z
 _atom_site_U_iso_or_equiv
 _atom_site_adp_type
 _atom_site_occupancy
 _atom_site_symmetry_multiplicity
 _atom_site_calc_flag
 _atom_site_refinement_flags
 _atom_site_disorder_assembly
 _atom_site_disorder_group
Cl1 Cl 0.17950(14) 0.78498(4) 0.15870(4) 0.02312(17) Uani 1 1 d . . .
Cl2 Cl 0.32716(15) 0.82719(4) 0.36907(4) 0.02367(17) Uani 1 1 d . . .
Cl3 Cl -0.19900(15) 0.57466(4) 0.08989(4) 0.02736(18) Uani 1 1 d . . .
O1 O 0.0914(5) 0.65481(13) 0.48187(11) 0.0317(4) Uani 1 1 d . . .
H1 H 0.2310 0.7053 0.4930 0.048 Uiso 1 1 calc R . .
C6 C -0.1035(6) 0.60038(16) 0.20514(14) 0.0187(4) Uani 1 1 d . . .
C4 C -0.1272(6) 0.54630(16) 0.35981(15) 0.0226(5) Uani 1 1 d . . .
H4 H -0.1915 0.4959 0.4020 0.027 Uiso 1 1 calc R . .
C2 C 0.1266(5) 0.71244(15) 0.32796(14) 0.0182(4) Uani 1 1 d . . .
C1 C 0.0600(5) 0.69364(15) 0.23516(14) 0.0175(4) Uani 1 1 d . . .
C3 C 0.0343(6) 0.63879(16) 0.39087(14) 0.0204(4) Uani 1 1 d . . .
C5 C -0.1945(6) 0.52732(15) 0.26769(16) 0.0210(4) Uani 1 1 d . . .
H5 H -0.3041 0.4636 0.2468 0.025 Uiso 1 1 calc R . .
 
loop_
 _atom_site_aniso_label
 _atom_site_aniso_U_11
 _atom_site_aniso_U_22
 _atom_site_aniso_U_33
 _atom_site_aniso_U_23
 _atom_site_aniso_U_13
 _atom_site_aniso_U_12
Cl1 0.0284(3) 0.0205(3) 0.0212(3) 0.00595(17) 0.0062(2) -0.00027(18)
Cl2 0.0283(3) 0.0177(3) 0.0248(3) -0.00316(18) 0.0022(2) -0.00325(18)
Cl3 0.0355(3) 0.0272(3) 0.0188(3) -0.00407(19) 0.0008(2) -0.0002(2)
O1 0.0501(11) 0.0292(9) 0.0152(8) 0.0007(6) 0.0019(7) -0.0078(8)
C6 0.0203(10) 0.0191(10) 0.0166(10) -0.0017(7) 0.0014(8) 0.0038(8)
C4 0.0266(11) 0.0174(10) 0.0245(11) 0.0044(8) 0.0051(9) 0.0005(8)
C2 0.0182(10) 0.0149(9) 0.0212(11) -0.0001(7) 0.0019(8) 0.0001(7)
C1 0.0179(10) 0.0150(9) 0.0200(10) 0.0030(7) 0.0037(8) 0.0029(7)
C3 0.0239(11) 0.0198(10) 0.0177(10) 0.0009(7) 0.0030(8) 0.0029(8)
C5 0.0224(10) 0.0148(9) 0.0259(11) -0.0007(8) 0.0037(8) -0.0008(8)
 
_geom_special_details
;
 All s.u.'s (except the s.u. in the dihedral angle between two l.s. planes)
 are estimated using the full covariance matrix.  The cell s.u.'s are taken
 into account individually in the estimation of s.u.'s in distances, angles
 and torsion angles; correlations between s.u.'s in cell parameters are only
 used when they are defined by crystal symmetry.  An approximate (isotropic)
 treatment of cell s.u.'s is used for estimating s.u.'s involving l.s. planes.
;
 
loop_
 _geom_bond_atom_site_label_1
 _geom_bond_atom_site_label_2
 _geom_bond_distance
 _geom_bond_site_symmetry_2
 _geom_bond_publ_flag
Cl1 C1 1.726(2) . ?
Cl2 C2 1.731(2) . ?
Cl3 C6 1.734(2) . ?
O1 C3 1.355(3) . ?
O1 H1 0.8400 . ?
C6 C5 1.389(3) . ?
C6 C1 1.394(3) . ?
C4 C5 1.380(3) . ?
C4 C3 1.386(3) . ?
C4 H4 0.9500 . ?
C2 C1 1.389(3) . ?
C2 C3 1.400(3) . ?
C5 H5 0.9500 . ?
 
loop_
 _geom_angle_atom_site_label_1
 _geom_angle_atom_site_label_2
 _geom_angle_atom_site_label_3
 _geom_angle
 _geom_angle_site_symmetry_1
 _geom_angle_site_symmetry_3
 _geom_angle_publ_flag
C3 O1 H1 109.5 . . ?
C5 C6 C1 120.0(2) . . ?
C5 C6 Cl3 119.33(16) . . ?
C1 C6 Cl3 120.62(16) . . ?
C5 C4 C3 120.06(19) . . ?
C5 C4 H4 120.0 . . ?
C3 C4 H4 120.0 . . ?
C1 C2 C3 120.81(19) . . ?
C1 C2 Cl2 121.03(16) . . ?
C3 C2 Cl2 118.16(16) . . ?
C2 C1 C6 119.05(19) . . ?
C2 C1 Cl1 120.09(16) . . ?
C6 C1 Cl1 120.86(16) . . ?
O1 C3 C4 118.11(19) . . ?
O1 C3 C2 122.53(19) . . ?
C4 C3 C2 119.4(2) . . ?
C4 C5 C6 120.67(19) . . ?
C4 C5 H5 119.7 . . ?
C6 C5 H5 119.7 . . ?
 
loop_
 _geom_torsion_atom_site_label_1
 _geom_torsion_atom_site_label_2
 _geom_torsion_atom_site_label_3
 _geom_torsion_atom_site_label_4
 _geom_torsion
 _geom_torsion_site_symmetry_1
 _geom_torsion_site_symmetry_2
 _geom_torsion_site_symmetry_3
 _geom_torsion_site_symmetry_4
 _geom_torsion_publ_flag
C3 C2 C1 C6 0.5(3) . . . . ?
Cl2 C2 C1 C6 -179.69(15) . . . . ?
C3 C2 C1 Cl1 -179.44(16) . . . . ?
Cl2 C2 C1 Cl1 0.4(3) . . . . ?
C5 C6 C1 C2 -0.6(3) . . . . ?
Cl3 C6 C1 C2 178.84(16) . . . . ?
C5 C6 C1 Cl1 179.33(16) . . . . ?
Cl3 C6 C1 Cl1 -1.2(2) . . . . ?
C5 C4 C3 O1 179.2(2) . . . . ?
C5 C4 C3 C2 0.2(3) . . . . ?
C1 C2 C3 O1 -179.2(2) . . . . ?
Cl2 C2 C3 O1 1.0(3) . . . . ?
C1 C2 C3 C4 -0.3(3) . . . . ?
Cl2 C2 C3 C4 179.90(16) . . . . ?
C3 C4 C5 C6 -0.3(3) . . . . ?
C1 C6 C5 C4 0.5(3) . . . . ?
Cl3 C6 C5 C4 -178.94(17) . . . . ?
 
